# Supplementary material for: Colorimetric sensor assay for discrimination of proteins based on exonuclease I-triggered aggregation of DNA-functionalized gold nanoparticles
Source: Royal Society of Chemistry journal article supplement (doi:10.1039/c9an00918c), 2019-01-01
Supplement: c9an00918c1.pdf [file c9an00918c1.pdf]

## Supporting Information

### **Colorimetric sensor assay for discrimination of proteins based on exonuclease I-triggered aggregation of DNA-functionalized gold nanoparticles**

Fangfang Jia,<sup>1</sup> Qingyun Liu,<sup>2</sup> Wei Wei,<sup>3\*</sup> Zhengbo Chen<sup>4\*</sup>

<sup>1</sup> School of Biology and Food, Shangqiu Normal University, Wenhua Road No. 298,  
Shangqiu, 476000, P. R.

<sup>2</sup> College of Chemical and Environmental Engineering, Shandong University of  
Science and Technology, Qingdao, 266590, China

<sup>3</sup> school of Chemistry and Chemical Engineering, Shangqiu Normal University,  
Wenhua Road No. 298, Shangqiu, 476000, P. R.

<sup>4</sup> Department of Chemistry, Capital Normal University, Beijing, 100048, China.

Email: weiweizzuli@163.com; czb979216@sina.com

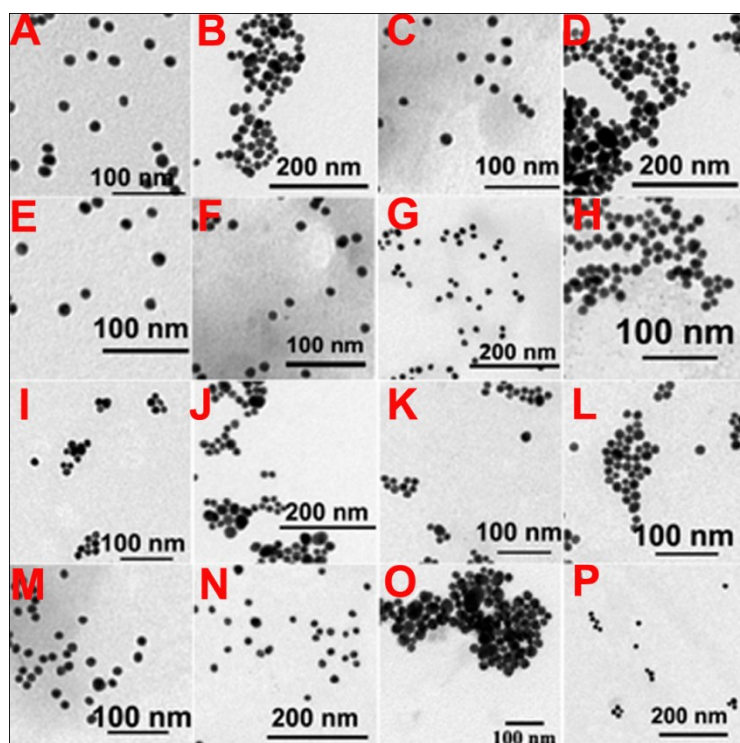

**Fig. S1** TEM images of DNA-AuNPs (A) in the absence of Exo I, (B) Hem-DNA-AuNPs, (C) Try-DNA-AuNPs, (D) BSA-DNA-AuNPs, (E) UAO-DNA-AuNPs, (F) Pep-DNA-AuNPs, (G) Lys-DNA-AuNPs, (H) EA-DNA-AuNPs, (I) Myo-DNA-AuNPs, (J) HRP-DNA-AuNPs, (K) TRF-DNA-AuNPs, (L) Cyt-C-DNA-AuNPs, (M) Thr-DNA-AuNPs, (N) Lip-DNA-AuNPs, (O) Con-DNA-AuNPs, and (P) Fib-DNA-AuNPs in presence of Exo I in salt media.

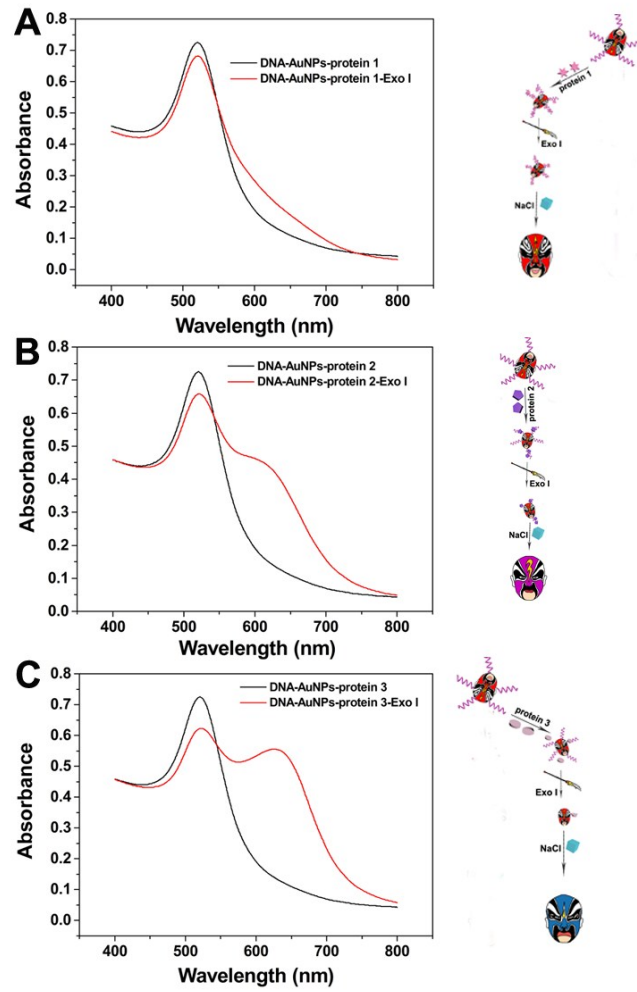

**Fig. S2** UV-vis spectra of AuNPs corresponding to (A) DNA-AuNPs-protein 1, (B) DNA-AuNPs-protein 1,, and (C) DNA-AuNPs-protein 3 in the absence and presence of Exo I. AuNP concentration: 5 nM, Exo I concentration: 40 U/mL, NaCl concentration: 0.3 M, and protein concentration: 20 nM.

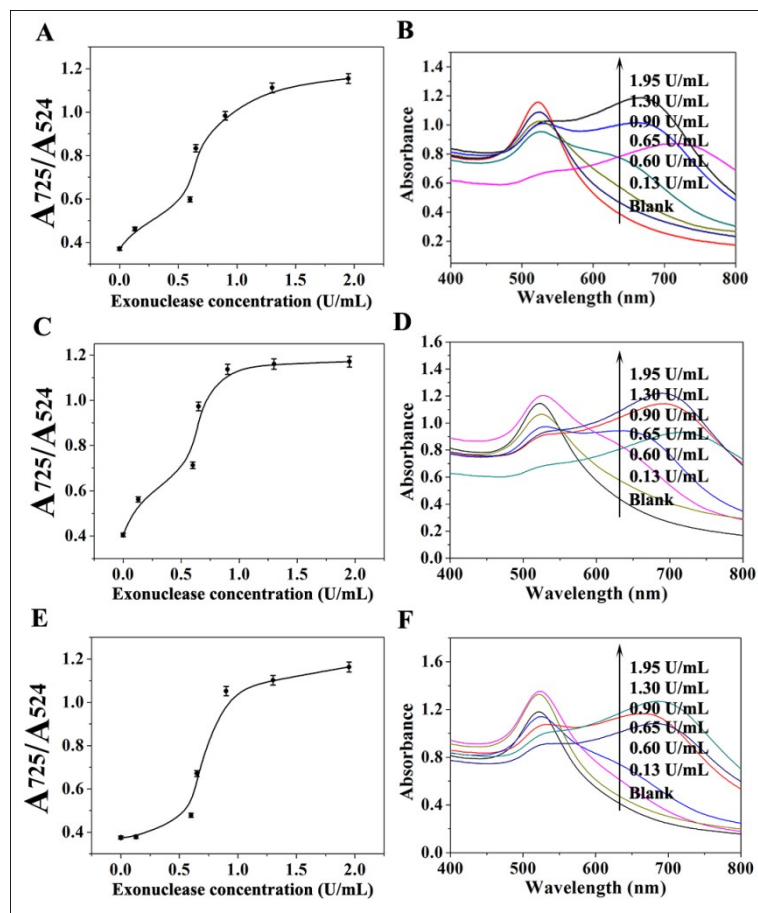

**Fig. S3** Plots of AuNP absorbance ratio ( $A_{725}/A_{524}$ ) vs Exo I concentration for (A) A15, (C) C15, and (E) T15, respectively. Corresponding UV-vis spectra of (B), (D), and (F) corresponding to (A), (C), and (E), respectively. Error bars indicate the standard deviation of three independent experiments. The solution does contain proteins. Incubation time of NaCl and DNA is 5 min and 3 h, respectively.

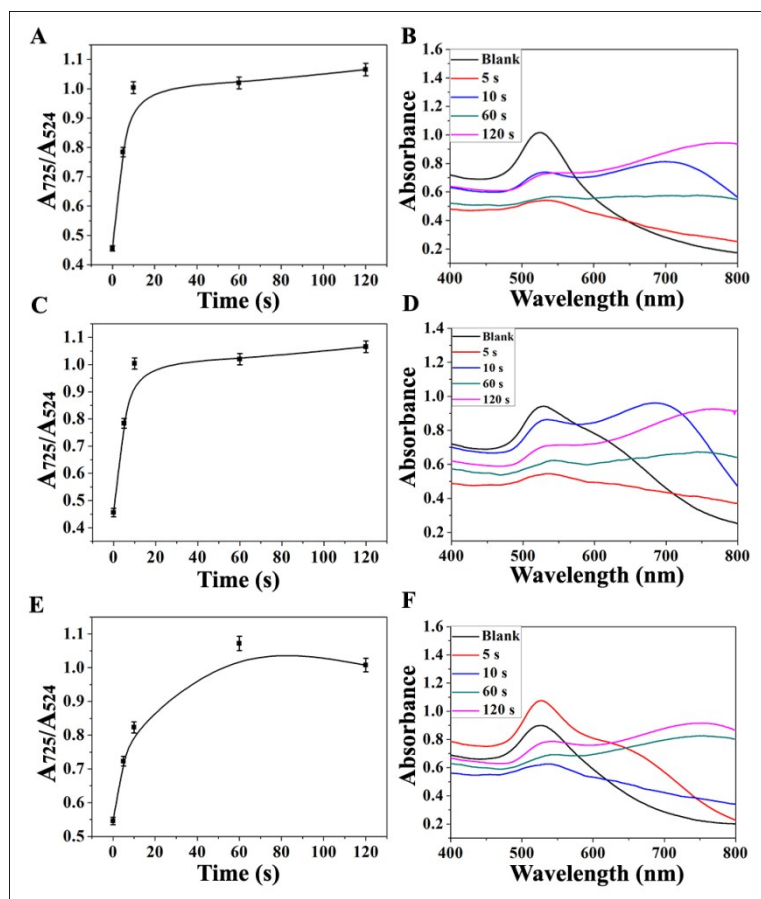

**Fig. S4** Plots of AuNP absorbance ratio ( $A_{725}/A_{524}$ ) vs the incubation time of Exo I for (A) A15, (C) C15, and (E) T15, respectively. Corresponding UV-vis spectra of (B), (D), and (F) corresponding to (A), (C), and (E), respectively. Error bars indicate the standard deviation of three independent experiments. The solution does contain proteins. Incubation time of NaCl and DNA is 5 min and 3 h, respectively.

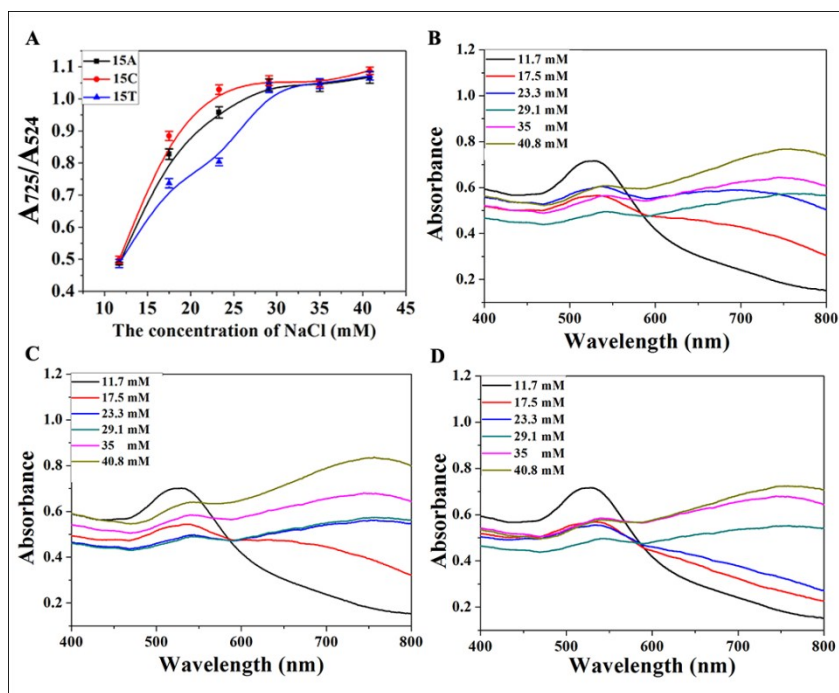

**Fig. S5** (A) The colorimetric responses ( $A_{725}/A_{524}$ ) of the sensor array plotted vs different concentrations of NaCl for A15, C15, and T15, respectively. UV-vis spectra of AuNPs followed with Exo I digestion in the presence of different concentrations of NaCl for (B) A15, (C) C15, and (D) T15, respectively. Error bars indicate the standard deviation of three independent experiments.

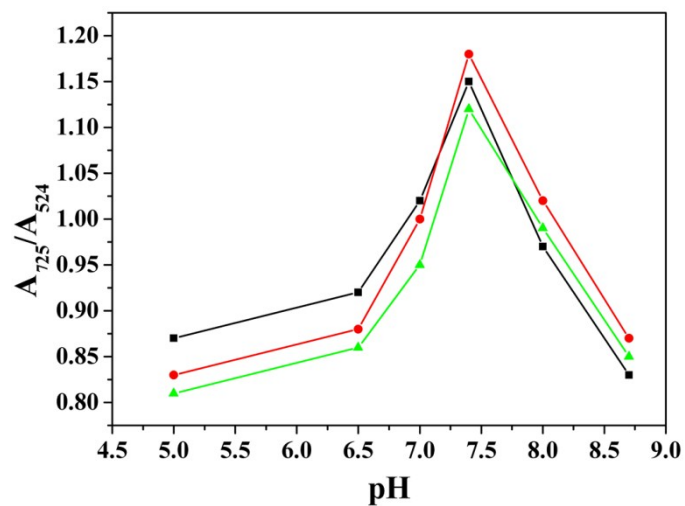

**Fig. S6** The colorimetric responses ( $A_{725}/A_{524}$ ) of the sensor array plotted vs different pH value of the solution for A15 (black line), C15 (red line), and T15 (green line), respectively.

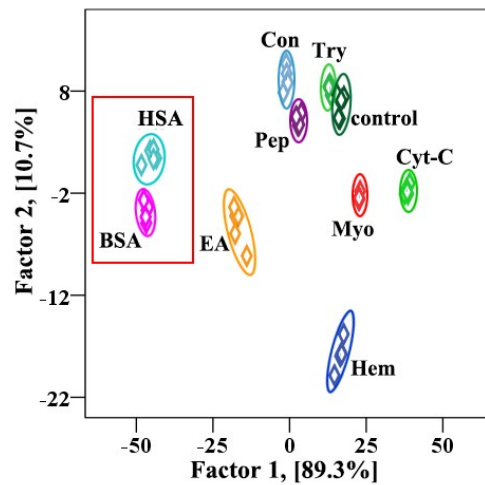

**Fig. S7.** Canonical score plot for the sensor array against the 9 proteins (HSA, BSA, EA, Hem, Myo, Pep, Con, Try, and Cyt-C) at 20 nM.



**Table S1.** Jackknifed classification matrix obtained using LDA based on 15A, 15C, 15T, 15A+15C, 15A+15T, 15C+15T, and 15A+15C+15T as receptors for the 15 proteins of 20 nM, respectively.

| Proteins | UV-15A | UV-15C | UV-15T | UV-15A+15C | UV-15A+15T | UV-15C+15T | UV-15A+15C+15T |
|----------|--------|--------|--------|------------|------------|------------|----------------|
| Hem      | 100%   | 100%   | 0%     | 100%       | 100%       | 100%       | 100%           |
| Try      | 100%   | 100%   | 40%    | 100%       | 100%       | 100%       | 100%           |
| BSA      | 80%    | 20%    | 80%    | 80%        | 100%       | 80%        | 100%           |
| UAO      | 100%   | 80%    | 100%   | 100%       | 100%       | 100%       | 100%           |
| Pep      | 100%   | 100%   | 100%   | 100%       | 100%       | 100%       | 100%           |
| Lys      | 100%   | 60%    | 100%   | 100%       | 100%       | 100%       | 100%           |
| EA       | 60%    | 100%   | 20%    | 100%       | 100%       | 100%       | 100%           |
| Myo      | 100%   | 100%   | 0%     | 100%       | 80%        | 80%        | 100%           |
| HRP      | 100%   | 100%   | 40%    | 100%       | 100%       | 100%       | 100%           |
| TRF      | 100%   | 100%   | 100%   | 100%       | 100%       | 100%       | 100%           |
| Cyt-C    | 40%    | 100%   | 100%   | 100%       | 100%       | 100%       | 100%           |
| Thr      | 80%    | 60%    | 100%   | 100%       | 100%       | 100%       | 100%           |
| Lip      | 80%    | 80%    | 60%    | 100%       | 100%       | 80%        | 100%           |
| Con      | 60%    | 40%    | 80%    | 100%       | 100%       | 80%        | 100%           |
| Fib      | 80%    | 40%    | 60%    | 100%       | 100%       | 40%        | 100%           |

**Table S2.** The training matrix of the colorimetric response patterns against 15 proteins using this sensor assay. The concentrations of 15A, 15C, and 15T are all 1  $\mu$ M; AuNPs, 5 nM; Exo-I, 40 U/ml; NaCl, 300 mM.

| Proteins | 15A      | 15C      | 15T      |
|----------|----------|----------|----------|
| Hem      | 0.960557 | 0.991905 | 0.992123 |
| Hem      | 0.960925 | 0.991148 | 0.99458  |
| Hem      | 0.95961  | 0.990428 | 0.992734 |
| Hem      | 0.959452 | 0.990439 | 0.99491  |
| Hem      | 0.960912 | 0.991186 | 0.993783 |
| Try      | 0.981959 | 0.994573 | 0.98327  |
| Try      | 0.981264 | 0.994429 | 0.985256 |
| Try      | 0.981319 | 0.994625 | 0.983251 |
| Try      | 0.981453 | 0.994627 | 0.985726 |
| Try      | 0.982081 | 0.994175 | 0.988478 |
| BSA      | 0.948779 | 0.983972 | 0.973623 |
| BSA      | 0.948085 | 0.987786 | 0.973758 |
| BSA      | 0.94242  | 0.987659 | 0.972164 |
| BSA      | 0.947477 | 0.988519 | 0.972279 |
| BSA      | 0.949336 | 0.986047 | 0.97338  |
| UAO      | 0.969946 | 0.985336 | 0.974162 |
| UAO      | 0.969834 | 0.984517 | 0.974348 |
| UAO      | 0.969998 | 0.984794 | 0.974323 |
| UAO      | 0.968736 | 0.985622 | 0.974287 |
| UAO      | 0.968996 | 0.985991 | 0.973944 |
| Pep      | 0.956399 | 0.979543 | 1.001765 |
| Pep      | 0.955918 | 0.980717 | 1.000295 |
| Pep      | 0.956186 | 0.979689 | 1.001487 |
| Pep      | 0.956148 | 0.980924 | 1.00004  |
| Pep      | 0.95637  | 0.979498 | 1.001749 |
| Lys      | 0.951748 | 0.989742 | 1.010698 |
| Lys      | 0.952369 | 0.989141 | 1.016524 |
| Lys      | 0.953274 | 0.989881 | 1.013689 |
| Lys      | 0.951809 | 0.989654 | 1.0164   |
| Lys      | 0.953168 | 0.990701 | 1.012389 |
| EA       | 0.964425 | 0.983013 | 0.982276 |
| EA       | 0.962667 | 0.983048 | 0.984865 |
| EA       | 0.96457  | 0.983392 | 0.984751 |
| EA       | 0.962866 | 0.983408 | 0.984749 |
| EA       | 0.963594 | 0.982875 | 0.98392  |
| Myo      | 0.936413 | 0.988315 | 0.98409  |
| Myo      | 0.935464 | 0.988288 | 1.002535 |
| Myo      | 0.935746 | 0.988847 | 1.000591 |
| Myo      | 0.93594  | 0.989142 | 1.003126 |
| Myo      | 0.936849 | 0.988012 | 1.001673 |

|       |          |          |          |
|-------|----------|----------|----------|
| HRP   | 0.958242 | 0.976293 | 0.994677 |
| HRP   | 0.957884 | 0.977278 | 0.993121 |
| HRP   | 0.958324 | 0.976281 | 0.993304 |
| HRP   | 0.957828 | 0.976324 | 0.993184 |
| HRP   | 0.958407 | 0.977296 | 0.994621 |
| TRF   | 0.857358 | 0.905013 | 0.952427 |
| TRF   | 0.855123 | 0.899865 | 0.952718 |
| TRF   | 0.850787 | 0.903234 | 0.948797 |
| TRF   | 0.850272 | 0.905056 | 0.952628 |
| TRF   | 0.851294 | 0.899648 | 0.950468 |
| Cyt-C | 0.931694 | 0.943749 | 0.980472 |
| Cyt-C | 0.928439 | 0.932902 | 0.9807   |
| Cyt-C | 0.936953 | 0.936643 | 0.981154 |
| Cyt-C | 0.932504 | 0.938912 | 0.980859 |
| Cyt-C | 0.934954 | 0.934562 | 0.982113 |
| Thr   | 0.943969 | 0.984472 | 1.00635  |
| Thr   | 0.940071 | 0.98276  | 1.007194 |
| Thr   | 0.939932 | 0.984342 | 1.006688 |
| Thr   | 0.94012  | 0.98435  | 1.006921 |
| Thr   | 0.940642 | 0.98322  | 1.006038 |
| Lip   | 0.94527  | 0.995996 | 0.989125 |
| Lip   | 0.944063 | 0.997831 | 0.987682 |
| Lip   | 0.944017 | 0.998264 | 0.985254 |
| Lip   | 0.946795 | 0.997942 | 0.987685 |
| Lip   | 0.944673 | 0.994856 | 0.986895 |
| Con   | 0.964455 | 0.975397 | 0.990009 |
| Con   | 0.962779 | 0.973545 | 0.98988  |
| Con   | 0.963094 | 0.977545 | 0.992326 |
| Con   | 0.963861 | 0.974436 | 0.990246 |
| Con   | 0.962289 | 0.973121 | 0.98999  |
| Fib   | 0.931221 | 0.975505 | 0.992612 |
| Fib   | 0.929608 | 0.968013 | 0.997053 |
| Fib   | 0.926855 | 0.976112 | 0.990673 |
| Fib   | 0.928355 | 0.972022 | 0.992739 |
| Fib   | 0.92526  | 0.977087 | 0.992424 |

**Table S3.** The training matrix of the colorimetric response patterns against Try with different concentrations (2.5-30 nM) using this sensor assay.

| Poteins | UV-15A   | UV-15C   | UV-15T   | EDs      |
|---------|----------|----------|----------|----------|
| 2.5 nM  | 1.024171 | 1.032481 | 0.995454 | 1.762349 |
| 2.5 nM  | 1.024059 | 1.03236  | 0.995329 | 1.762142 |
| 2.5 nM  | 1.024296 | 1.032604 | 0.995571 | 1.76256  |
| 2.5 nM  | 1.024327 | 1.032632 | 0.995619 | 1.762621 |
| 2.5 nM  | 1.024183 | 1.032481 | 0.995458 | 1.762358 |
| 5 nM    | 1.022822 | 1.02606  | 0.994902 | 1.757496 |
| 5 nM    | 1.022947 | 1.026188 | 0.995028 | 1.757715 |
| 5 nM    | 1.022956 | 1.026191 | 0.995039 | 1.757728 |
| 5 nM    | 1.022621 | 1.025858 | 0.994687 | 1.757139 |
| 5 nM    | 1.022732 | 1.025973 | 0.99479  | 1.757329 |
| 10 nM   | 1.022378 | 1.014711 | 0.973618 | 1.738627 |
| 10 nM   | 1.022489 | 1.014816 | 0.973726 | 1.738814 |
| 10 nM   | 1.022492 | 1.01482  | 0.973739 | 1.738826 |
| 10 nM   | 1.022483 | 1.014826 | 0.973719 | 1.738813 |
| 10 nM   | 1.022268 | 1.014551 | 0.97351  | 1.738409 |
| 15 nM   | 1.020301 | 1.008467 | 0.935284 | 1.712535 |
| 15 nM   | 1.021511 | 1.009637 | 0.936474 | 1.714595 |
| 15 nM   | 1.020411 | 1.008582 | 0.935474 | 1.712772 |
| 15 nM   | 1.020415 | 1.008595 | 0.935419 | 1.712752 |
| 15 nM   | 1.02018  | 1.008326 | 0.93514  | 1.712301 |
| 20 nM   | 1.017317 | 1.003541 | 0.908506 | 1.693343 |
| 20 nM   | 1.018557 | 1.004961 | 0.909956 | 1.695708 |
| 20 nM   | 1.017408 | 1.003584 | 0.908604 | 1.693476 |
| 20 nM   | 1.017431 | 1.00365  | 0.908612 | 1.693533 |
| 20 nM   | 1.017207 | 1.003394 | 0.908347 | 1.693105 |
| 30 nM   | 0.997447 | 0.994814 | 0.864288 | 1.65274  |
| 30 nM   | 0.997568 | 0.994955 | 0.864421 | 1.652968 |
| 30 nM   | 0.997581 | 0.994953 | 0.864426 | 1.652977 |
| 30 nM   | 0.997592 | 0.994956 | 0.864435 | 1.65299  |
| 30 nM   | 0.997336 | 0.994699 | 0.864171 | 1.652543 |

**Table S4.** Training matrix of the response patterns against BSA and Hem at the same concentration (20 nM), respectively, as well as the mixtures of these two proteins samples with various molar ratios (total concentration: 20 nM) using the sensor array.

| Proteins        | UV-15A | UV-15C | UV-15T |
|-----------------|--------|--------|--------|
| 100% Hem        | 1.039  | 0.970  | 0.986  |
| 100% Hem        | 1.035  | 0.970  | 0.988  |
| 100% Hem        | 1.049  | 0.971  | 0.986  |
| 100% Hem        | 1.032  | 0.971  | 0.996  |
| 100% Hem        | 1.047  | 0.970  | 0.989  |
| 100% BSA        | 0.660  | 0.931  | 0.549  |
| 100% BSA        | 0.674  | 0.927  | 0.557  |
| 100% BSA        | 0.664  | 0.925  | 0.553  |
| 100% BSA        | 0.663  | 0.931  | 0.558  |
| 100% BSA        | 0.658  | 0.921  | 0.553  |
| 10% Hem+90% BSA | 0.455  | 0.474  | 0.476  |
| 10% Hem+90% BSA | 0.456  | 0.473  | 0.476  |
| 10% Hem+90% BSA | 0.454  | 0.473  | 0.477  |
| 10% Hem+90% BSA | 0.455  | 0.473  | 0.477  |
| 10% Hem+90% BSA | 0.456  | 0.473  | 0.477  |
| 30% Hem+70% BSA | 0.499  | 0.626  | 0.683  |
| 30% Hem+70% BSA | 0.499  | 0.626  | 0.682  |
| 30% Hem+70% BSA | 0.498  | 0.631  | 0.684  |
| 30% Hem+70% BSA | 0.499  | 0.625  | 0.684  |
| 30% Hem+70% BSA | 0.491  | 0.625  | 0.680  |
| 50% Hem+50% BSA | 0.660  | 0.718  | 0.749  |
| 50% Hem+50% BSA | 0.659  | 0.718  | 0.753  |
| 50% Hem+50% BSA | 0.663  | 0.720  | 0.750  |
| 50% Hem+50% BSA | 0.663  | 0.712  | 0.752  |
| 50% Hem+50% BSA | 0.662  | 0.715  | 0.750  |
| 70% Hem+30% BSA | 0.703  | 0.874  | 0.781  |
| 70% Hem+30% BSA | 0.713  | 0.876  | 0.781  |
| 70% Hem+30% BSA | 0.706  | 0.874  | 0.781  |
| 70% Hem+30% BSA | 0.708  | 0.869  | 0.781  |
| 70% Hem+30% BSA | 0.706  | 0.870  | 0.781  |
| 90% Hem+10% BSA | 1.027  | 1.162  | 1.116  |
| 90% Hem+10% BSA | 1.022  | 1.161  | 1.115  |
| 90% Hem+10% BSA | 1.026  | 1.166  | 1.121  |
| 90% Hem+10% BSA | 1.026  | 1.164  | 1.118  |
| 90% Hem+10% BSA | 1.027  | 1.162  | 1.124  |

**Table S5.** Training matrix of the response patterns against Try and HRP at the same concentration (20 nM), respectively, as well as the mixtures of these two proteins samples with various molar ratios (total concentration: 20 nM) using the sensor array.

| Proteins        | UV-15A | UV-15C | UV-15T |
|-----------------|--------|--------|--------|
| 100% Try        | 0.994  | 0.948  | 0.976  |
| 100% Try        | 1.107  | 0.940  | 0.969  |
| 100% Try        | 1.049  | 0.953  | 0.967  |
| 100% Try        | 1.059  | 0.949  | 0.972  |
| 100% Try        | 1.049  | 0.947  | 0.972  |
| 100% HRP        | 0.690  | 0.755  | 0.803  |
| 100% HRP        | 0.689  | 0.756  | 0.801  |
| 100% HRP        | 0.690  | 0.755  | 0.801  |
| 100% HRP        | 0.690  | 0.755  | 0.805  |
| 100% HRP        | 0.690  | 0.757  | 0.801  |
| 10% Try+90% HRP | 0.981  | 1.237  | 0.793  |
| 10% Try+90% HRP | 0.987  | 1.242  | 0.794  |
| 10% Try+90% HRP | 0.992  | 1.244  | 0.799  |
| 10% Try+90% HRP | 0.979  | 1.246  | 0.792  |
| 10% Try+90% HRP | 0.981  | 1.243  | 0.795  |
| 30% Try+70% HRP | 1.081  | 1.232  | 1.042  |
| 30% Try+70% HRP | 1.088  | 1.282  | 1.041  |
| 30% Try+70% HRP | 1.091  | 1.255  | 1.042  |
| 30% Try+70% HRP | 1.092  | 1.243  | 1.043  |
| 30% Try+70% HRP | 1.082  | 1.220  | 1.041  |
| 50% Try+50% HRP | 1.149  | 1.203  | 1.047  |
| 50% Try+50% HRP | 1.150  | 1.202  | 1.031  |
| 50% Try+50% HRP | 1.149  | 1.203  | 1.049  |
| 50% Try+50% HRP | 1.148  | 1.205  | 1.048  |
| 50% Try+50% HRP | 1.149  | 1.201  | 1.051  |
| 70% Try+30% HRP | 1.120  | 1.126  | 1.111  |
| 70% Try+30% HRP | 1.101  | 1.127  | 1.112  |
| 70% Try+30% HRP | 1.129  | 1.126  | 1.110  |
| 70% Try+30% HRP | 1.128  | 1.126  | 1.113  |
| 70% Try+30% HRP | 1.122  | 1.127  | 1.111  |
| 90% Try+10% HRP | 1.041  | 1.166  | 1.104  |
| 90% Try+10% HRP | 1.043  | 1.174  | 1.109  |
| 90% Try+10% HRP | 1.043  | 1.169  | 1.108  |
| 90% Try+10% HRP | 1.043  | 1.165  | 1.108  |
| 90% Try+10% HRP | 1.043  | 1.166  | 1.104  |

**Table S6.** Training matrix of the response patterns against the mixtures of proteins (total concentration 20 nM) using this sensor array.

| Protiens    | UV-15A   | UV-15C   | UV-15T   |
|-------------|----------|----------|----------|
| Hem+Try     | 0.898314 | 1.014467 | 1.012944 |
| Hem+Try     | 0.897097 | 1.014486 | 1.012965 |
| Hem+Try     | 0.899115 | 1.014859 | 1.014084 |
| Hem+Try     | 0.899217 | 1.015899 | 1.016609 |
| Hem+Try     | 0.899026 | 1.016956 | 1.015444 |
| BSA+UAO     | 0.957476 | 0.980979 | 0.972611 |
| BSA+UAO     | 0.959259 | 0.980948 | 0.97564  |
| BSA+UAO     | 0.956383 | 0.982292 | 0.973567 |
| BSA+UAO     | 0.956477 | 0.981146 | 0.977869 |
| BSA+UAO     | 0.9553   | 0.98325  | 0.975723 |
| Pep+Lys     | 0.900804 | 1.00279  | 1.006606 |
| Pep+Lys     | 0.897658 | 1.002792 | 1.005157 |
| Pep+Lys     | 0.899683 | 1.003144 | 1.00656  |
| Pep+Lys     | 0.899784 | 1.004185 | 1.006326 |
| Pep+Lys     | 0.897717 | 1.005247 | 1.006346 |
| EA+Myo      | 0.971702 | 0.974304 | 1.017217 |
| EA+Myo      | 0.969462 | 0.974266 | 1.017254 |
| EA+Myo      | 0.969565 | 0.975628 | 1.016978 |
| EA+Myo      | 0.973733 | 0.974455 | 1.018437 |
| EA+Myo      | 0.970528 | 0.975526 | 1.018266 |
| HRP+TRF     | 0.974221 | 1.027735 | 1.026747 |
| HRP+TRF     | 0.968802 | 1.02748  | 1.026555 |
| HRP+TRF     | 0.973127 | 1.027584 | 1.026611 |
| HRP+TRF     | 0.970068 | 1.028724 | 1.030794 |
| HRP+TRF     | 0.971896 | 1.027818 | 1.027559 |
| Cyt-C+Thr   | 1.03387  | 1.013209 | 1.029843 |
| Cyt-C+Thr   | 1.027083 | 1.013232 | 1.027324 |
| Cyt-C+Thr   | 1.032886 | 1.013186 | 1.02736  |
| Cyt-C+Thr   | 1.030542 | 1.013491 | 1.03108  |
| Cyt-C+Thr   | 1.031666 | 1.014543 | 1.027279 |
| Lip+Con     | 0.967237 | 0.98905  | 1.02116  |
| Lip+Con     | 0.971585 | 0.988827 | 1.024391 |
| Lip+Con     | 0.967275 | 0.989272 | 1.019709 |
| Lip+Con     | 0.968436 | 0.987567 | 1.022186 |
| Lip+Con     | 0.967067 | 0.988835 | 1.025613 |
| Fib+Hem+BSA | 0.98648  | 0.952705 | 1.017742 |
| Fib+Hem+BSA | 0.986164 | 0.951381 | 1.01536  |
| Fib+Hem+BSA | 0.988563 | 0.951649 | 1.016488 |
| Fib+Hem+BSA | 0.985459 | 0.952753 | 1.01894  |
| Fib+Hem+BSA | 0.639517 | 0.953972 | 1.018791 |
| Con+Try+Myo | 1.003749 | 1.008063 | 1.029513 |

|                  |          |          |          |
|------------------|----------|----------|----------|
| Con+Try+Myo      | 0.999264 | 1.008081 | 1.02551  |
| Con+Try+Myo      | 1.002654 | 1.009553 | 1.032463 |
| Con+Try+Myo      | 1.000514 | 1.008335 | 1.030891 |
| Con+Try+Myo      | 1.003533 | 1.009385 | 1.025049 |
| Lip+UAO+EA       | 0.991604 | 1.008322 | 1.046692 |
| Con+Try+Myo      | 0.993211 | 1.008344 | 1.04209  |
| Con+Try+Myo      | 0.991514 | 1.007177 | 1.046714 |
| Con+Try+Myo      | 0.988619 | 1.0086   | 1.041692 |
| Con+Try+Myo      | 0.989545 | 1.011192 | 1.047772 |
| Thr+HRP+Fib      | 0.97311  | 0.998089 | 1.038948 |
| Thr+HRP+Fib      | 0.970708 | 0.997834 | 1.040362 |
| Thr+HRP+Fib      | 0.969852 | 0.999645 | 1.041397 |
| Thr+HRP+Fib      | 0.969964 | 0.999813 | 1.042421 |
| Thr+HRP+Fib      | 0.971817 | 0.99768  | 1.042738 |
| Cyt-C+Pep+TRF    | 1.0138   | 1.024319 | 1.021632 |
| Cyt-C+Pep+TRF    | 1.012568 | 1.024014 | 1.021672 |
| Cyt-C+Pep+TRF    | 1.015148 | 1.027629 | 1.022785 |
| Cyt-C+Pep+TRF    | 1.01512  | 1.025914 | 1.021568 |
| Cyt-C+Pep+TRF    | 1.014947 | 1.023744 | 1.022901 |
| Lys+Hem+Pep+HRP  | 1.030093 | 0.982339 | 1.007024 |
| Lys+Hem+Pep+HRP  | 1.028635 | 0.978694 | 1.008414 |
| Lys+Hem+Pep+HRP  | 1.028997 | 0.980862 | 1.008258 |
| Lys+Hem+Pep+HRP  | 1.026892 | 0.976992 | 1.006847 |
| Lys+Hem+Pep+HRP  | 1.031124 | 0.983496 | 1.008062 |
| Try+BSA+EA+Cyt-C | 1.008975 | 1.014743 | 1.037215 |
| Try+BSA+EA+Cyt-C | 1.007737 | 1.014777 | 1.037416 |
| Try+BSA+EA+Cyt-C | 1.007972 | 1.01328  | 1.036131 |
| Try+BSA+EA+Cyt-C | 1.009053 | 1.015048 | 1.037271 |
| Try+BSA+EA+Cyt-C | 1.006569 | 1.01609  | 1.037071 |
| UAO+Lys+TRF+Lip  | 1.03242  | 1.020269 | 1.024846 |
| UAO+Lys+TRF+Lip  | 1.030937 | 1.023051 | 1.026049 |
| UAO+Lys+TRF+Lip  | 1.03096  | 1.022071 | 1.023541 |
| UAO+Lys+TRF+Lip  | 1.030908 | 1.020423 | 1.027242 |
| UAO+Lys+TRF+Lip  | 1.032326 | 1.022999 | 1.025903 |
| Pep+Myo+Thr+Fib  | 1.007541 | 0.909416 | 0.977928 |
| Pep+Myo+Thr+Fib  | 1.006139 | 0.910318 | 0.977997 |
| Pep+Myo+Thr+Fib  | 1.005275 | 0.907553 | 0.979093 |
| Pep+Myo+Thr+Fib  | 1.005426 | 0.909433 | 0.979    |
| Pep+Myo+Thr+Fib  | 1.007403 | 0.909494 | 0.979071 |



**Table S7. Identification of unknown protein samples at 20 nM using the sensor array.**

| Samples | UV-15A   | UV-15C   | UV-15T   | Identification | Verification |
|---------|----------|----------|----------|----------------|--------------|
| 1       | 0.960557 | 0.991905 | 0.992123 | Hem            | Hem          |
| 2       | 0.960925 | 0.991148 | 0.99458  | Hem            | Hem          |
| 3       | 0.95961  | 0.990428 | 0.992734 | Hem            | Hem          |
| 4       | 0.959452 | 0.990439 | 0.99491  | Hem            | Hem          |
| 5       | 0.960912 | 0.991186 | 0.993783 | Hem            | Hem          |
| 6       | 0.981959 | 0.994573 | 0.98327  | Try            | Try          |
| 7       | 0.981264 | 0.994429 | 0.985256 | Try            | Try          |
| 8       | 0.981319 | 0.994625 | 0.983251 | Try            | Try          |
| 9       | 0.981453 | 0.994627 | 0.985726 | Try            | Try          |
| 10      | 0.982081 | 0.994175 | 0.988478 | Try            | Try          |
| 11      | 0.948779 | 0.983972 | 0.973623 | BSA            | BSA          |
| 12      | 0.948085 | 0.987786 | 0.973758 | BSA            | BSA          |
| 13      | 0.94242  | 0.987659 | 0.972164 | BSA            | Thr          |
| 14      | 0.947477 | 0.988519 | 0.972279 | BSA            | BSA          |
| 15      | 0.949336 | 0.986047 | 0.97338  | BSA            | BSA          |
| 16      | 0.969946 | 0.985336 | 0.974162 | UAO            | UAO          |
| 17      | 0.969834 | 0.984517 | 0.974348 | UAO            | UAO          |
| 18      | 0.969998 | 0.984794 | 0.974323 | UAO            | UAO          |
| 19      | 0.968736 | 0.985622 | 0.974287 | UAO            | UAO          |
| 20      | 0.968996 | 0.985991 | 0.973944 | UAO            | UAO          |
| 21      | 0.956399 | 0.979543 | 1.001765 | Pep            | Pep          |
| 22      | 0.955918 | 0.980717 | 1.000295 | Pep            | Pep          |
| 23      | 0.956186 | 0.979689 | 1.001487 | Pep            | Pep          |
| 24      | 0.956148 | 0.980924 | 1.00004  | Pep            | Pep          |
| 25      | 0.95637  | 0.979498 | 1.001749 | Pep            | Pep          |
| 26      | 0.951748 | 0.989742 | 1.010698 | Lys            | Lys          |
| 27      | 0.952369 | 0.989141 | 1.016524 | Lys            | Lys          |
| 28      | 0.953274 | 0.989881 | 1.013689 | Lys            | Lys          |
| 29      | 0.951809 | 0.989654 | 1.0164   | Lys            | Lys          |
| 30      | 0.936413 | 0.932902 | 0.98409  | Lys            | Cyt-C        |
| 31      | 0.964425 | 0.983013 | 0.982276 | EA             | EA           |
| 32      | 0.962667 | 0.983048 | 0.984865 | EA             | EA           |
| 33      | 0.96457  | 0.983392 | 0.984751 | EA             | EA           |
| 34      | 0.962866 | 0.983408 | 0.984749 | EA             | EA           |
| 35      | 0.963594 | 0.982875 | 0.98392  | EA             | EA           |

**Table S8.** Training matrix of the response patterns against proteins (each at 20nM) in the presence of serum using the sensor array.

| Proteins | UV-15A   | UV-15C   | UV-15T   |
|----------|----------|----------|----------|
| Hem      | 1.096903 | 1.063452 | 0.989415 |
| Hem      | 1.092568 | 1.060907 | 0.990389 |
| Hem      | 1.085584 | 1.065793 | 0.992585 |
| Hem      | 1.086013 | 1.066516 | 0.988414 |
| Hem      | 1.092498 | 1.064474 | 0.991526 |
| Try      | 1.157922 | 1.057323 | 0.969762 |
| Try      | 1.156124 | 1.050643 | 0.973823 |
| Try      | 1.148546 | 1.056873 | 0.969964 |
| Try      | 1.153101 | 1.055873 | 0.970799 |
| Try      | 1.150557 | 1.057344 | 0.973827 |
| BSA      | 0.652544 | 1.091286 | 0.937824 |
| BSA      | 0.653416 | 1.089584 | 0.939686 |
| BSA      | 0.650039 | 1.089827 | 0.942784 |
| BSA      | 0.648065 | 1.093207 | 0.93876  |
| BSA      | 0.6528   | 1.09126  | 0.941724 |
| UAO      | 1.105319 | 1.076541 | 0.989951 |
| UAO      | 1.10993  | 1.069672 | 0.98883  |
| UAO      | 1.106179 | 1.077653 | 0.993077 |
| UAO      | 1.104433 | 1.079581 | 0.98577  |
| UAO      | 1.104517 | 1.077705 | 0.990952 |
| Pep      | 1.18152  | 1.059253 | 1.039247 |
| Pep      | 1.18241  | 1.061303 | 1.04373  |
| Pep      | 1.174771 | 1.057363 | 1.0414   |
| Pep      | 1.176733 | 1.060913 | 1.036904 |
| Pep      | 1.179294 | 1.062223 | 1.040264 |
| Lys      | 1.191316 | 1.093958 | 0.974527 |
| Lys      | 1.194937 | 1.089305 | 0.976197 |
| Lys      | 1.187152 | 1.093001 | 0.977271 |
| Lys      | 1.183727 | 1.092445 | 0.97196  |
| Lys      | 1.186459 | 1.093559 | 0.974991 |
| EA       | 1.165969 | 1.065377 | 0.970531 |
| EA       | 1.165488 | 1.054164 | 0.972369 |
| EA       | 1.161859 | 1.062014 | 0.976794 |
| EA       | 1.165103 | 1.059646 | 0.968224 |
| EA       | 1.163814 | 1.060837 | 0.972367 |
| Myo      | 1.13543  | 1.072677 | 1.014456 |
| Myo      | 1.139901 | 1.070208 | 1.015946 |
| Myo      | 1.131263 | 1.072411 | 1.014478 |
| Myo      | 1.136806 | 1.074229 | 1.015401 |
| Myo      | 1.131977 | 1.074166 | 1.01466  |

|       |          |          |          |
|-------|----------|----------|----------|
| HRP   | 1.175168 | 1.005667 | 0.969518 |
| HRP   | 1.174707 | 1.00399  | 0.97359  |
| HRP   | 1.171002 | 1.006071 | 0.976947 |
| HRP   | 1.170351 | 1.004464 | 0.971712 |
| HRP   | 1.17427  | 1.006519 | 0.974743 |
| TRF   | 1.285588 | 1.116561 | 1.056362 |
| TRF   | 1.282354 | 1.109952 | 1.064436 |
| TRF   | 1.271685 | 1.110662 | 1.063127 |
| TRF   | 1.278093 | 1.118673 | 1.057376 |
| TRF   | 1.273502 | 1.116696 | 1.06079  |
| Cyt-C | 1.148569 | 1.093716 | 1.002061 |
| Cyt-C | 1.147978 | 1.087891 | 1.006222 |
| Cyt-C | 1.147174 | 1.090016 | 1.005196 |
| Cyt-C | 1.146466 | 1.089421 | 1.001009 |
| Cyt-C | 1.149124 | 1.090514 | 1.006301 |
| Thr   | 1.183345 | 1.077796 | 0.993375 |
| Thr   | 1.186901 | 1.065197 | 0.996383 |
| Thr   | 1.185893 | 1.07027  | 0.996405 |
| Thr   | 1.18794  | 1.076645 | 0.992246 |
| Thr   | 1.185231 | 1.075132 | 0.995375 |
| Lip   | 1.122927 | 1.038606 | 0.956021 |
| Lip   | 1.121311 | 1.032995 | 0.958866 |
| Lip   | 1.122599 | 1.032471 | 0.961053 |
| Lip   | 1.121948 | 1.034571 | 0.955906 |
| Lip   | 1.122041 | 1.036982 | 0.95774  |
| Con   | 1.16077  | 1.057407 | 0.96862  |
| Con   | 1.162933 | 1.045826 | 0.968862 |
| Con   | 1.16057  | 1.050843 | 0.973746 |
| Con   | 1.159913 | 1.052934 | 0.965843 |
| Con   | 1.161248 | 1.051137 | 0.968859 |
| Fib   | 0.957718 | 1.068271 | 0.979204 |
| Fib   | 0.956157 | 1.062435 | 0.982081 |
| Fib   | 0.959    | 1.064689 | 0.980774 |
| Fib   | 0.957109 | 1.066727 | 0.980262 |
| Fib   | 0.953797 | 1.065104 | 0.982096 |

**Table S9** The relative standard deviations (RSDs) for results from the sensor array for each protein at 20 nM.

| protein | Hem  | Try  | BSA  | UAO  | Pep  | Lys  | EA   | Myo  | HRP  | TRF  | Cyt-C | Thr  | Lip  | Con  | Fib  |
|---------|------|------|------|------|------|------|------|------|------|------|-------|------|------|------|------|
| RSD (%) | 3.19 | 4.54 | 2.15 | 3.88 | 3.51 | 5.74 | 3.09 | 4.79 | 3.06 | 3.38 | 5.11  | 4.05 | 2.07 | 3.92 | 1.80 |
